# Supplementary material
Source: PubMed Central journal article supplement (PMC2774109)
Supplement: NIHMS153046-supplement-SuppData.pdf [file NIHMS153046-supplement-SuppData.pdf]

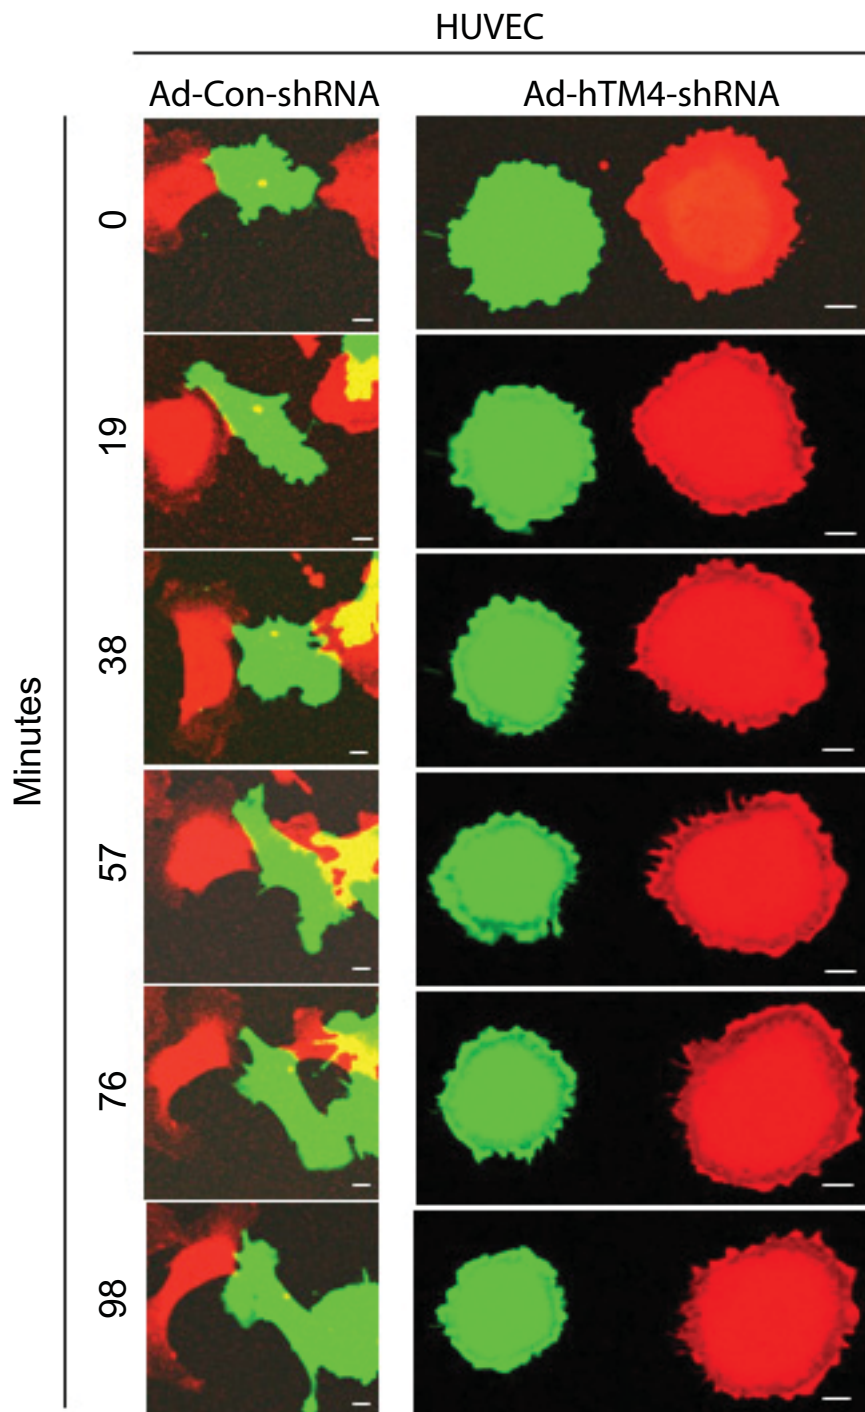

Figure S1. TM4SF1-KD renders HUVEC immobile. 24h after transfection with Ad-Con-shRNA or Ad-hTM4-shRNA, HUVEC were transfected with adenoviruses expressing either green (GFP) or red (RFP) fluorescent proteins. Two days later, GFP and RFP-labeled cells were mixed 1:1 and imaged continuously by LSM510 META, using a live cell Zeiss confocal system (excitation wavelengths of 488 and 568 nm). Image analysis was performed using Velocity (Improvision). TM4SF1-KD HUVEC exhibited little or no motion over 89 min. Scale bars, 10  $\mu$ m.
